# Supplementary material
Source: PubMed Central journal article supplement (PMC5741418)
Supplement: supp_5.4.E878_2017-0100-1-at.pdf [file supp_5.4.E878_2017-0100-1-at.pdf]

## Appendix 1 (as supplied by the authors): Drugs included in each antimicrobial class

### Antibiotics

- Amikacin
- Amoxicillin
- Amoxicillin & clavulanic acid
- Ampicillin
- Azithromycin
- Cefaclor
- Cefadroxil
- Cefazolin
- Cefixime
- Cefotaxime
- Cefoxitin
- Cefprozil
- Ceftazidime
- Ceftriaxone
- Cefuroxime
- Cephalexin
- Ciprofloxacin
- Clarithromycin
- Clindamycin
- Cloxacillin
- Colistin
- Dapsone
- Daptomycin
- Demeclocycline
- Doxycycline
- Ertapenem
- Erythromycin
- Ethambutol
- Ethionamide
- Fidaxomicin
- Fosfomicin
- Fusidic acid
- Gatifloxacin
- Gentamicin
- Isoniazid
- Levofloxacin
- Linezolid
- Meropenem
- Metronidazole
- Minocycline
- Moxifloxacin
- Nitrofurantoin
- Norfloxacin
- Ofloxacin
- Paromomycin
- Penicillin V
- Penicillin V benzathine

- Piperacillin & tazobactam
- Pivampicillin
- Pyrazinamide
- Rifabutin
- Rifampin
- Streptomycin
- Trimethoprim & sulfamethoxazole
- Telithromycin
- Tetracycline
- Tigecycline
- Tobramycin
- Trimethoprim
- Vancomycin

### Antivirals

- Abacavir
- Abacavir & lamivudine
- Abacavir & dolutegravir & lamivudine
- Abacavir & lamivudine & zidovudine
- Acyclovir
- Adefovir
- Amantadine
- Amprenavir
- Atazanavir
- Boceprevir
- Cobicistat & elvitegravir & emtricitabine & tenofovir
- Darunavir
- Dasabuvir & ombitasvir & paritaprevir & ritonavir
- Delavirdine
- Didanosine
- Dolutegravir
- Efavirenz
- Efavirenz & emtricitabine & tenofovir
- Emtricitabine & rilpivirine & tenofovir
- Emtricitabine & tenofovir
- Enfuvirtide
- Entecavir
- Etravirine
- Fanciclovir

- Fosamprenavir
- Ganciclovir
- Indinavir
- Lamivudine
- Lamivudine & zidovudine
- Ledipasvir & sofosbuvir
- Lopinavir & ritonavir
- Maraviroc
- Nelfinavir
- Nevirapine
- Oseltamivir
- Peg-Interferon alfa 2B
- Peg-Interferon alfa-2B & ribavirin
- Raltegravir
- Ribavirin
- Rilpivirine
- Ritonavir
- Saquinavir
- Simeprevir
- Sofosbuvir
- Stavudine
- Telaprevir
- Tenofovir
- Tipranavir
- Valacyclovir
- Valganciclovir
- Zidovudine

### Antifungals

- Amphotericin B
- Atovaquone
- Caspofungin
- Fluconazole
- Griseofulvin
- Itraconazole
- Ketoconazole
- Micafungin
- Nystatin
- Pentamidine isethionate
- Posaconazole
- Terbinafine
- Voriconazole

### Antiparasitics

- Chloroquine
- Hydroxychloroquine
- Mebendazole

- Praziquantel
- Pyrimethamine
- Pyrvinium
- Quinine
