# Supplementary material
Source: PubMed Central journal article supplement (PMC5741418)
Supplement: supp_5.4.E878_2017-0100-2-at.pdf [file supp_5.4.E878_2017-0100-2-at.pdf]

**Appendix 2 (as supplied by the authors):** Antibiotics included in each antibiotic class

| <b>Antibiotic class</b>                                 | <b>Antibiotics</b>                                                                                                                                |
|---------------------------------------------------------|---------------------------------------------------------------------------------------------------------------------------------------------------|
| Aminoglycosides                                         | Amikacin<br>Gentamicin<br>Paromomycin<br>Streptomycin<br>Tobramycin                                                                               |
| Antitubercular agents<br><i>(removed from analyses)</i> | Ethambutol<br>Ethionamide<br>Isoniazid<br>Pyrazinamide<br>Rifabutin<br>Rifampin                                                                   |
| Carbapenems                                             | Ertapenem<br>Meropenem                                                                                                                            |
| Cephalosporins                                          | Cefaclor<br>Cefadroxil<br>Cefazolin<br>Cefixime<br>Cefotaxime<br>Cefoxitin<br>Cefprozil<br>Ceftazidime<br>Ceftriaxone<br>Cefuroxime<br>Cephalexin |
| Fluoroquinolones                                        | Ciprofloxacin<br>Gatifloxacin<br>Levofloxacin<br>Moxifloxacin<br>Ofloxacin                                                                        |
| Glycopeptides                                           | Vancomycin                                                                                                                                        |
| Lincosamides                                            | Clindamycin                                                                                                                                       |
| Macrolides                                              | Azithromycin<br>Clarithromycin<br>Erythromycin<br>Fidaxomicin<br>Telithromycin                                                                    |
| Metronidazole                                           | Metronidazole                                                                                                                                     |

|                                   |                                                                                                                                                                        |
|-----------------------------------|------------------------------------------------------------------------------------------------------------------------------------------------------------------------|
| Penicillins                       | Amoxicillin<br>Amoxicillin and clavulanic acid<br>Ampicillin<br>Cloxacillin<br>Penicillin V<br>Penicillin V benzathine<br>Piperacillin and tazobactam<br>Pivampicillin |
| Tetracyclines                     | Demeclocycline<br>Doxycycline<br>Minocycline<br>Tetracycline<br>Tigecycline                                                                                            |
| Trimethoprim and/or sulphonamides | Trimethoprim<br>Trimethoprim and sulfamethoxazole<br>Sulfisoxazole and erythromycin                                                                                    |
| Other urinary anti-infectives     | Fosfomycin<br>Nitrofurantoin                                                                                                                                           |
| Other antibiotics                 | Colistin<br>Dapsone<br>Daptomycin<br>Fusidic acid<br>Linezolid                                                                                                         |
