# Supplementary material
Source: PubMed Central journal article supplement (PMC5741418)

**Appendix 3 (as supplied by the authors):** Total outpatient prescriptions, in defined daily doses per 1000 person days, of the 10 antibiotics most commonly prescribed to Ontario's senior residents, divided by infectious disease indication, from 2006 to 2015. TMP/SMX = trimethoprim-sulfamethoxazole.

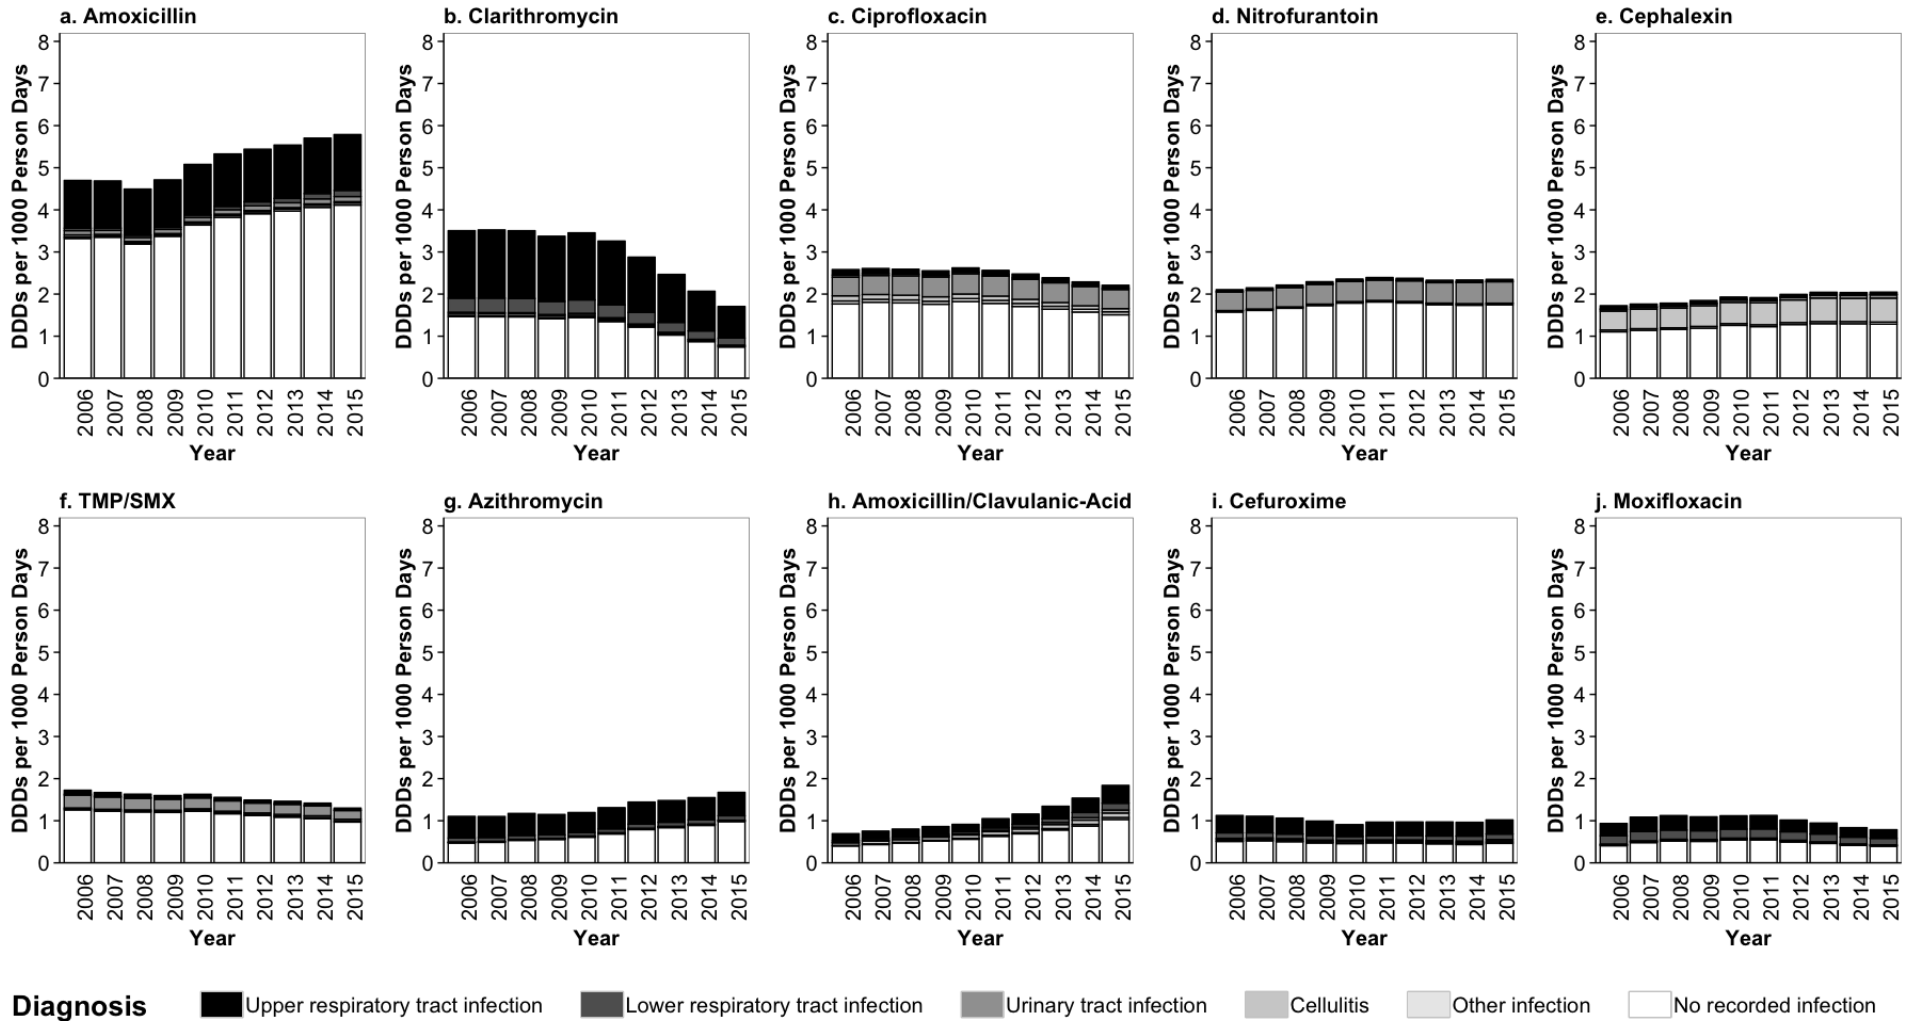

Supplement: supp_5.4.E878_2017-0100-3-at.pdf [file supp_5.4.E878_2017-0100-3-at.pdf]
