# Supplementary material
Source: PubMed Central journal article supplement (PMC5741418)
Supplement: supp_5.4.E878_2017-0100-Original_submission.pdf [file supp_5.4.E878_2017-0100-Original_submission.pdf]

## A decade of outpatient antimicrobial use in senior residents of Ontario

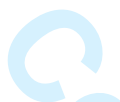

|                               |                                                                                                                                                                                                                                                                                                                                                                                                                                                                                                                                                                                                                                                                                                                                                                                                                                                                                        |
|-------------------------------|----------------------------------------------------------------------------------------------------------------------------------------------------------------------------------------------------------------------------------------------------------------------------------------------------------------------------------------------------------------------------------------------------------------------------------------------------------------------------------------------------------------------------------------------------------------------------------------------------------------------------------------------------------------------------------------------------------------------------------------------------------------------------------------------------------------------------------------------------------------------------------------|
| Journal:                      | <i>CMAJ Open</i>                                                                                                                                                                                                                                                                                                                                                                                                                                                                                                                                                                                                                                                                                                                                                                                                                                                                       |
| Manuscript ID                 | CMAJOpen-2017-0100                                                                                                                                                                                                                                                                                                                                                                                                                                                                                                                                                                                                                                                                                                                                                                                                                                                                     |
| Manuscript Type:              | Descriptive                                                                                                                                                                                                                                                                                                                                                                                                                                                                                                                                                                                                                                                                                                                                                                                                                                                                            |
| Date Submitted by the Author: | 01-Aug-2017                                                                                                                                                                                                                                                                                                                                                                                                                                                                                                                                                                                                                                                                                                                                                                                                                                                                            |
| Complete List of Authors:     | Tan, Charlie; Sunnybrook Research Institute<br>Graves, Erin; Institute for Clinical Evaluative Sciences<br>Lu, Hong; Institute for Clinical Evaluative Sciences<br>Chen, Anna; Institute for Clinical Evaluative Sciences<br>Li, Shudong; Institute for Clinical Evaluative Sciences<br>Schwartz, Kevin; Public Health Ontario; University of Toronto Dalla Lana School of Public Health<br>Daneman, Nick; Sunnybrook Research Institute; Institute for Clinical Evaluative Sciences; Sunnybrook Health Sciences Centre, Division of Infectious Diseases                                                                                                                                                                                                                                                                                                                               |
| Keywords:                     | Drugs and therapeutics, Epidemiology, Family medicine, general practice, primary care, Health services research, Infectious diseases                                                                                                                                                                                                                                                                                                                                                                                                                                                                                                                                                                                                                                                                                                                                                   |
| More Detailed Keywords:       |                                                                                                                                                                                                                                                                                                                                                                                                                                                                                                                                                                                                                                                                                                                                                                                                                                                                                        |
| Abstract:                     | <p>Background: Antimicrobials are frequently prescribed to community-dwelling seniors. Our aim was to examine the prevalence, quantity and indications of antimicrobial prescriptions to elderly individuals residing in Ontario, Canada.</p> <p>Methods: We conducted a 10-year population-based analysis of outpatient antimicrobial prescriptions to Ontario's seniors, from 2006 to 2015. Antimicrobial prescriptions, infectious disease diagnoses and prescriber information were determined from linked healthcare databases. Our analyses were primarily focused on antibiotics, which comprise the highest burden of antimicrobial use.</p> <p>Results: We identified 2 879 779 unique senior residents of Ontario over our study period. On average, 40.7% of seniors in any given year received one or more antibiotic prescriptions (range 40.1% to 41.5%). Antibiotic</p> |

1  
2  
3  
4  
5  
6  
7  
8  
9  
10  
11  
12  
13  
14  
15  
16  
17  
18  
19  
20  
21  
22  
23  
24  
25  
26  
27  
28  
29  
30  
31  
32  
33  
34  
35  
36  
37  
38  
39  
40  
41  
42  
43  
44  
45  
46  
47  
48  
49  
50  
51  
52  
53  
54  
55  
56  
57  
58  
59  
60

|  |                                                                                                                                                                                                                                                                                                                                                                                                                                                                                                                                                                                                                                                                                                                                                                                                                                                                                                                                                                                                                                                                                                      |
|--|------------------------------------------------------------------------------------------------------------------------------------------------------------------------------------------------------------------------------------------------------------------------------------------------------------------------------------------------------------------------------------------------------------------------------------------------------------------------------------------------------------------------------------------------------------------------------------------------------------------------------------------------------------------------------------------------------------------------------------------------------------------------------------------------------------------------------------------------------------------------------------------------------------------------------------------------------------------------------------------------------------------------------------------------------------------------------------------------------|
|  | <p>usage remained stable, averaging 30.1 DDDs per 1000 person days per year (range 28.5 to 31.1 DDDs per 1000 person days per year). Selection of antibiotics evolved, with increasing use of penicillins and decreasing use of trimethoprim-sulfamethoxazole, fluoroquinolones and macrolides. For 67.0% of prescriptions, no infectious disease diagnoses were identified within seven days. Of those with an associated diagnosis, upper respiratory tract infection was most common (16.7%), followed by urinary tract infection (8.6%), lower respiratory tract infection (4.1%), cellulitis (4.0%), and other infection (1.7%). The majority of antibiotics were prescribed by family physicians.</p> <p>Interpretation: Outpatient antibiotic use among Ontario's seniors has remained stable since 2006. Current methods of measuring usage are not capable of accurately determining indication. Additional data sources to monitor the appropriateness of community antimicrobial use are needed, as well as outpatient stewardship programs specifically targeting family physicians.</p> |
|  |                                                                                                                                                                                                                                                                                                                                                                                                                                                                                                                                                                                                                                                                                                                                                                                                                                                                                                                                                                                                                                                                                                      |

SCHOLARONE™  
Manuscripts

Confidential

## A decade of outpatient antimicrobial use in senior residents of Ontario

Charlie Tan<sup>1</sup>, Erin Graves MSc<sup>2</sup>, Hong Lu PhD<sup>2</sup>, Anna Chen MPH<sup>2</sup>, Shudong Li PhD<sup>2</sup>, Kevin Schwartz MD MSc<sup>3,4</sup>, Nick Daneman MD MSc<sup>1,2,5</sup>

1. Sunnybrook Research Institute, Sunnybrook Health Sciences Centre, Toronto, Ontario
2. Institute for Clinical Evaluative Sciences, Toronto, Ontario
3. Public Health Ontario, Toronto, Ontario
4. Dalla Lana School of Public Health, University of Toronto, Toronto, Ontario
5. Division of Infectious Diseases, Sunnybrook Health Sciences Centre, Toronto, Ontario

Funding: This work was supported by Dr. Nick Daneman's Canadian Institutes of Health Research Clinician Scientist Salary Award, and an Applied Health Research Question fund via the Institute for Clinical Evaluative Sciences.

Competing interests: none declared

Corresponding author:

Nick Daneman  
Division of Infectious Diseases & Clinical Epidemiology  
Sunnybrook Health Sciences Centre  
University of Toronto  
Adjunct Scientist, Institute for Clinical Evaluative Sciences  
G-wing Room 106  
2075 Bayview Ave, Toronto ON Canada M4N 3M5  
Phone: 416-480-6100 x2791, Fax: 416-480-6737  
E-mail: [nick.daneman@sunnybrook.ca](mailto:nick.daneman@sunnybrook.ca)

## Abstract

**Background:** Antimicrobials are frequently prescribed to community-dwelling seniors. Our aim was to examine the prevalence, quantity and indications of antimicrobial prescriptions to elderly individuals residing in Ontario, Canada.

**Methods:** We conducted a 10-year population-based analysis of outpatient antimicrobial prescriptions to Ontario's seniors, from 2006 to 2015. Antimicrobial prescriptions, infectious disease diagnoses and prescriber information were determined from linked healthcare databases. Our analyses were primarily focused on antibiotics, which comprise the highest burden of antimicrobial use.

**Results:** We identified 2 879 779 unique senior residents of Ontario over our study period. On average, 40.7% of seniors in any given year received one or more antibiotic prescriptions (range 40.1% to 41.5%). Antibiotic usage remained stable, averaging 30.1 DDDs per 1000 person days per year (range 28.5 to 31.1 DDDs per 1000 person days per year). Selection of antibiotics evolved, with increasing use of penicillins and decreasing use of trimethoprim-sulfamethoxazole, fluoroquinolones and macrolides. For 67.0% of prescriptions, no infectious disease diagnoses were identified within seven days. Of those with an associated diagnosis, upper respiratory tract infection was most common (16.7%), followed by urinary tract infection (8.6%), lower respiratory tract infection (4.1%), cellulitis (4.0%), and other infection (1.7%). The majority of antibiotics were prescribed by family physicians.

**Interpretation:** Outpatient antibiotic use among Ontario's seniors has remained stable since 2006. Current methods of measuring usage are not capable of accurately determining indication. Additional data sources to monitor the appropriateness of community antimicrobial use are needed, as well as outpatient stewardship programs specifically targeting family physicians.

## Introduction

Antimicrobials are among the most commonly prescribed medications in Canada. The majority are dispensed in an outpatient setting, accounting for 93% of total use in 2014 (1). Many of these prescriptions are unnecessary or inappropriate, with antibiotics given for viral illnesses and increasing use of broad-spectrum agents (2-7). Such misuse of antimicrobials is the primary driver of antimicrobial resistance, which is increasingly recognized as an urgent public health challenge (8). Patients prescribed antibiotics in primary care are more likely to develop antibiotic resistant infections (9), while ecological studies have demonstrated increased rates of resistance in areas with higher outpatient antimicrobial use (10-12). Overuse is also associated with greater healthcare costs and adverse events (13-15).

Judicious use of antimicrobials is particularly important for older adults, who are prescribed these medications more frequently than younger individuals (1, 16-19). Among Ontario's seniors, antimicrobials are the fourth most common drug class prescribed, resulting in public healthcare expenditures of \$495 million (20). Given the atypical manifestations of infectious diseases in the elderly, empiric antibiotic therapy is often started in response to non-specific symptoms, signs or laboratory abnormalities (21). Older adults are at higher risk of adverse drug events due to polypharmacy, comorbidities and altered drug metabolism (21, 22). High rates of colonization with antimicrobial-resistant organisms have also been found in this population, in ambulatory, inpatient and long-term care settings (23-25).

In response to the threats posed by inappropriate antimicrobial use, several initiatives have been implemented to raise awareness and promote prudent prescribing. These include the Choosing Wisely Canada campaign (26) and Antibiotic Awareness Week (27), which provide education on antimicrobial resistance and recommendations for best practice. However, inter-

1  
2  
3 ventions for antimicrobial stewardship are challenging to implement in outpatient settings (28),  
4  
5 and surveillance of ambulatory antimicrobial use and resistance in Canada has been limited de-  
6  
7 spite calls to prioritize such efforts (29).  
8  
9

10  
11 The objective of our study was to describe patterns of outpatient antimicrobial prescribing in  
12  
13 senior residents of Ontario, over a 10-year period from 2006 to 2015.  
14  
15  
16  
17  
18  
19  
20  
21  
22  
23  
24  
25  
26  
27  
28  
29  
30  
31  
32  
33  
34  
35  
36  
37  
38  
39  
40  
41  
42  
43  
44  
45  
46  
47  
48  
49  
50  
51  
52  
53  
54  
55  
56  
57  
58  
59  
60

Confidential

## Methods

### *General study design*

We conducted a 10-year province-wide analysis of antimicrobial prescriptions to Ontario's senior residents, defined as 65 years of age or older, from January 1 2006 to December 31 2015. Approval was obtained from the research ethics board of Sunnybrook Health Sciences Centre.

### *Data sources*

This study used population-based administrative databases housed at the Institute for Clinical Evaluative Sciences. These databases are well validated and have previously been used in studies on antimicrobial prescribing (30-32). The Ontario Drug Benefit (ODB) Program database, which contains records of all publically funded medications prescribed to Ontario residents 65 years or older, was used for information on antimicrobial prescribing. This database exhibits greater than 99% accuracy when compared against pharmacy dispensing data (33). To identify Ontario's seniors and determine infectious disease diagnoses, the following databases were linked to the ODB database at the patient-level, using encoded health card numbers: the Registered Persons database (RPDB), which contains demographic information on the greater than 95% of Ontario residents with publically funded health insurance; the Ontario Health Insurance Plan (OHIP) database, which contains all billing claims made by healthcare providers for services performed in Ontario; the Canadian Institute for Health Information Discharge Abstracts Database (DAD), which contains information on all admissions, discharges and same-day surgeries in Ontario hospitals; and the National Ambulatory Care Reporting System (NACRS), which contains information on all emergency department visits in Ontario hospitals.

### *Statistical analyses*

1  
2  
3 **Antimicrobial prescriptions:** The RPDB was used to identify all Ontario residents age 65 or  
4  
5 older during our study period. Individuals were assessed for inclusion based on age as of Janu-  
6  
7 ary 1 of each calendar year. Residents who had no health system contact in the seven years  
8  
9 preceding assessment, or who died or moved to a different province between calendar years,  
10  
11 were excluded. We then used the ODB database to determine the proportion of Ontario senior  
12  
13 residents who were prescribed an antimicrobial in each calendar year from 2006 to 2015. Anti-  
14  
15 microbials were classified into one of four categories: antibiotics, antivirals, antifungals and an-  
16  
17 tiparasitics (**Supplementary File 1**).  
18  
19

20  
21  
22 **Antibiotic prescriptions:** Our subsequent analyses were focused on antibiotics, as this is the  
23  
24 most frequently prescribed category of antimicrobials and resistance to antibiotics is of greatest  
25  
26 public health concern (8). Using the ODB database, we determined the quantity of each antibi-  
27  
28 otic class and antibiotic drug prescribed to Ontario's seniors, in every calendar year from 2006  
29  
30 to 2015. Antibiotics were grouped into the following classes: aminoglycosides, cephalosporins,  
31  
32 fluoroquinolones, glycopeptides, lincosamides, macrolides, metronidazole, penicillins, tetracy-  
33  
34 clines, trimethoprim and/or sulphonamides, other urinary anti-infectives (nitrofurantoin, fosfomy-  
35  
36 cin), and other antibiotics. Antibiotic utilization was measured in defined daily doses (DDD) per  
37  
38 1000 person days. DDDs are a standardized metric of drug use developed by the World Health  
39  
40 Organization based on an assumed average daily maintenance dose (34). Person days were  
41  
42 calculated as the total number of seniors residing in Ontario in each calendar year, multiplied by  
43  
44 the number of days in that year. We also determined the number of seniors in each calendar  
45  
46 year who received multiple antibiotic prescriptions.  
47  
48  
49  
50

51  
52  
53 **Indications for antibiotic prescriptions:** Each antibiotic prescription was subsequently linked  
54  
55 to the physician claim, hospitalization, same-day surgery and emergency room databases to  
56  
57 identify any infectious disease diagnoses recorded within seven days before or after the antibi-  
58  
59  
60



1  
2  
3  
4  
5  
6  
7  
8  
9  
10  
11  
12  
13  
14  
15  
16  
17  
18  
19  
20  
21  
22  
23  
24  
25  
26  
27  
28  
29  
30  
31  
32  
33  
34  
35  
36  
37  
38  
39  
40  
41  
42  
43  
44  
45  
46  
47  
48  
49  
50  
51  
52  
53  
54  
55  
56  
57  
58  
59  
60

otic being dispensed. Diagnoses were grouped into the following categories: upper respiratory tract infection (URTI), lower respiratory tract infection (LRTI), urinary tract infection (UTI), cellulitis, other infection, and no recorded infection. We determined the proportion of each antibiotic class and drug's use associated with each clinical indication.

**Antibiotics prescribed for infectious disease diagnoses:** We identified all infectious disease diagnoses recorded in the OHIP, DAD and NACRS databases for calendar years 2006 and 2015. These diagnoses were then linked to the ODB database to examine whether a prescription for an antibiotic was filled in the seven days before or after each diagnosis. For the URTI, LRTI, UTI and cellulitis diagnosis categories, we determined the overall numbers of antibiotic prescriptions as well as the 10 most commonly prescribed antibiotics.

**Responsible prescribers:** To determine the healthcare providers most responsible for outpatient antibiotic use in Ontario's seniors, the proportion of prescriptions, in individual claims and DDDs, attributable to family physicians and specialists was determined. In addition, for residents who received multiple antibiotic prescriptions, we determined how many were provided prescriptions from the same physician compared to multiple physicians. This analysis was conducted for calendar years 2006 and 2015.

Analyses were performed with SAS statistical software version 9.3 (SAS Institute Inc., Cary, NC, USA) and R statistical software version 3.2.2 (R Foundation for Statistical Computing, Vienna, Austria).

## Results

### *Antimicrobial prescriptions*

During the study period, 2 879 779 unique residents of Ontario age 65 years or older were identified. The population of seniors increased from 1 646 909 in 2006 to 2 176 736 in 2015. Antibiotics were the most frequently prescribed type of antimicrobial. On average, 40.7% of Ontario's seniors received an antibiotic prescription in any study year, while 2.7%, 1.7% and 0.8% of seniors were prescribed an antiviral, antifungal or antiparasitic, respectively. The proportion of seniors prescribed an antiviral agent increased from 1.9% in 2006 to 4.4% in 2015 ( $p < 0.001$ ); antimicrobial use was otherwise stable across the 10 study years (**Figure 1**).

### *Antibiotic prescriptions*

The average quantity of antibiotics prescribed per calendar year was 30.1 DDDs per 1000 person days. Antibiotic usage remained relatively stable over the study period, decreasing slightly from 31.1 DDDs per 1000 person days in 2006 to 28.5 DDDs per 1000 person days in 2015. Seniors were commonly provided multiple antibiotic prescriptions within a single year, with 39.4% of recipients in 2006 and 38.2% in 2015 receiving more than one course.

The five most frequently prescribed antibiotic classes were penicillins, sulphonamides and/or trimethoprim, fluoroquinolones, macrolides and cephalosporins. Trends in their use from 2006 to 2015 are shown in **Figure 2**. Prescriptions for penicillins increased from 6.1 DDDs per 1000 person days in 2006 to 7.8 DDDs per 1000 person days in 2015. Use of sulphonamides and/or trimethoprim, the vast majority (97.8%) of which was comprised by trimethoprim-sulfamethoxazole, declined from 7.4 DDDs per 1000 person days in 2006 to 5.9 DDDs per 1000 person days in 2015. Prescriptions for fluoroquinolones and macrolides decreased as well, while cephalosporin use remained stable. Trends in use of the 10 most prescribed antibiotic

1  
2  
3 drugs over our study period, shown in **Figure 3**, reveal the rise in penicillin prescriptions was  
4 driven by greater use of amoxicillin, from 4.7 DDDs per 1000 person days in 2006 to 5.7 DDDs  
5 per 1000 person days in 2015, and amoxicillin-clavulanic acid, from 0.68 to 1.8 DDDs per 1000  
6 person days. Among fluoroquinolones, prescriptions for ciprofloxacin and moxifloxacin both de-  
7 clined; among macrolides, clarithromycin use decreased while azithromycin use increased.  
8  
9  
10  
11  
12  
13

#### 14 15 16 *Indications for antibiotic prescriptions*

17 From 2006 to 2015, 67.0% of antibiotics prescribed to Ontario's senior residents did not have a  
18 corresponding infectious disease diagnosis detectable within seven days of the prescription  
19  
20  
21  
22 **(Figure 3, white bar segments)**. The most frequently identified diagnosis was URTI, associat-  
23 ed with 16.7% of prescriptions, followed by UTI (8.6%), LRTI (4.1%), cellulitis (4.0%), and other  
24 infection (1.7%). URTIs were the most common diagnoses associated with penicillins and mac-  
25 rolicides, while UTIs were most common for trimethoprim-sulfamethoxazole. Among fluoroquin-  
26 olones, ciprofloxacin was associated with UTIs, while moxifloxacin was associated with URTIs  
27 and LRTIs. For cephalosporins, cellulitis was the most common diagnosis associated with  
28 cephalexin, while URTIs were most common for cefuroxime **(Figure 3)**.  
29  
30  
31  
32  
33  
34  
35  
36  
37  
38  
39  
40

#### 41 *Antibiotics prescribed for infectious disease diagnoses*

42 URTIs were the most commonly recorded diagnosis associated with an antibiotic prescription  
43 among Ontario's senior residents. There were 184 667 URTI episodes associated with outpa-  
44 tient antibiotics in 2006, rising to 211 549 episodes in 2015. Between 2006 and 2015, increased  
45 use of amoxicillin (0.80 to 0.98 DDDs per 1000 person days) and amoxicillin-clavulanic acid  
46 (0.10 to 0.29 DDDs per 1000 person days), and decreased use of clarithromycin (1.10 to 0.53  
47 DDDs per 1000 person days), trimethoprim-sulfamethoxazole (0.25 to 0.13 DDDs per 1000 per-  
48 son days) and fluoroquinolones were observed **(Figure 4a)**.  
49  
50  
51  
52  
53  
54  
55  
56  
57  
58  
59  
60

1  
2  
3 UTIs were the second most common indication for outpatient antibiotics; 75 645 antibiotic pre-  
4 scriptions for UTI diagnoses were identified in 2006, while 100 648 were identified in 2015. Use  
5 of trimethoprim-sulfamethoxazole declined from 0.90 to 0.63 DDDs per 1000 person days be-  
6 tween 2006 and 2015, but was the most frequently selected antibiotic in both years. Likewise,  
7 prescriptions for fluoroquinolones decreased, largely driven by a fall in norfloxacin use from 0.21  
8 to 0.07 DDDs per 1000 person days, though there was a small increase in ciprofloxacin use.  
9 Prescriptions for nitrofurantoin increased as well (**Figure 4b**).

10  
11  
12  
13  
14  
15  
16  
17  
18  
19  
20  
21 LRTIs were the third most common indication for outpatient antibiotic treatment in this popula-  
22 tion. There were 48 408 LRTI diagnoses with associated outpatient prescriptions in 2006, and  
23 66 273 in 2015. A substantial decrease in macrolide use was observed. Clarithromycin was the  
24 most frequently prescribed antibiotic for LRTIs in 2006 (0.29 DDDs per 1000 person days), but  
25 use fell to 0.15 DDDs per 1000 person days in 2015, below that of levofloxacin. In contrast, pre-  
26 scriptions for amoxicillin (from 0.05 to 0.14 DDDs per 1000 person days) and amoxicillin-  
27 clavulanic acid (from 0.03 to 0.13 DDDs per 1000 person days) increased. There were small  
28 declines in prescriptions for the respiratory fluoroquinolones, though levofloxacin was the most  
29 commonly prescribed antibiotic for LRTIs in 2015 (**Figure 4c**).

30  
31  
32  
33  
34  
35  
36  
37  
38  
39  
40  
41  
42  
43  
44  
45  
46  
47  
48  
49  
50  
51  
52  
53  
54  
55  
56  
57  
58  
59  
60  
Lastly, for cellulitis, 45 453 outpatient antibiotic treatments were prescribed in 2006, compared  
to 64 882 in 2015. Cephalexin was the most commonly prescribed antibiotic in both years, in-  
creasing from 0.36 DDDs per 1000 person days in 2006 to 0.47 DDDs per 1000 person days in  
2015. Cloxacillin, ciprofloxacin and clarithromycin were less commonly prescribed between the  
two years, while use of trimethoprim-sulfamethoxazole, clindamycin and amoxicillin-clavulanic  
acid increased (**Figure 4d**).

*Responsible prescribers*

1  
2  
3 Family physicians accounted for the majority of outpatient antibiotics prescribed to Ontario's  
4 senior residents (**Table 1**). Antibiotic prescriptions by family physicians and specialists both in-  
5 creased from 2006 to 2015, with proportionately more specialist prescriptions in 2015. For pa-  
6 tients who received multiple antibiotic prescriptions in 2006, 49.6% received their prescriptions  
7 from the same physician, while 50.4% received their prescriptions from multiple physicians. In  
8 2015, multiple prescriptions were provided to 40.1% of recipients by a single physician, with the  
9 remaining 59.9% receiving prescriptions from multiple physicians.  
10  
11  
12  
13  
14  
15  
16  
17  
18  
19  
20  
21  
22  
23  
24  
25  
26  
27  
28  
29  
30  
31  
32  
33  
34  
35  
36  
37  
38  
39  
40  
41  
42  
43  
44  
45  
46  
47  
48  
49  
50  
51  
52  
53  
54  
55  
56  
57  
58  
59  
60

Confidential

## Interpretation

This study of 2 879 779 unique elderly residents of Ontario found that in every year from 2006 to 2015, approximately 40% of seniors were prescribed an antibiotic in an outpatient setting. Selection of antibiotics evolved over the study period, with increasing use of amoxicillin and amoxicillin-clavulanic acid, and decreasing use of trimethoprim-sulfamethoxazole, fluoroquinolones and macrolides. More than two thirds of antibiotic prescriptions did not have a corresponding infectious disease diagnosis recorded in Ontario physician claim, hospitalization, same-day surgery or emergency room databases within seven days of the prescription being given. URTI was the most commonly identified indication for antibiotics, as well as the diagnosis with the greatest number of associated prescriptions, and family physicians were responsible for the majority of outpatient antibiotic prescribing to Ontario's seniors.

Our results diverge from the rise in broad-spectrum antibiotic use, including broad-spectrum cephalosporins, fluoroquinolones and macrolides, reported in prior studies (2, 5, 16). This may represent a positive change in antibiotic prescribing practices, with physicians favouring narrow-spectrum agents where appropriate. However, overall outpatient antibiotic use remained stable over our study period, averaging 30.1 DDDs per 1000 person days per year. Although this is higher than rates reported in prior literature (1, 35), benchmarking is difficult for several reasons. Our study was limited to seniors, a population prescribed antibiotics more frequently than other age groups (1, 16-19). Unlike other datasets, the ODB database also includes medications dispensed in other ambulatory settings, such as long-term care facilities, in addition to community pharmacies. Nevertheless, this finding suggests that total antibiotic prescribing has not been curtailed by existing stewardship interventions. Indeed, although recommendations from Choosing Wisely Canada and the Get Smart: Know When Antibiotics Work program in the United States are directed to ambulatory care, formalized antimicrobial stewardship programs have predominantly targeted inpatient settings. Since more than 90% of antimicrobials are prescribed

1  
2  
3 in outpatient care, further stewardship efforts in Ontario, directed at family physicians in particu-  
4 lar, are urgently needed.  
5  
6  
7  
8

9  
10 The antibiotics prescribed for URTIs changed over our study period. Prescriptions for fluoro-  
11 quinolones and macrolides declined while penicillin use increased, contrasting with previous  
12 analyses demonstrating rising selection of the former classes (2-4, 6, 7). This is in keeping with  
13 society guidelines recommending amoxicillin or amoxicillin-clavulanic acid as first-line therapy  
14 for bacterial URTIs (36, 37). However, URTIs remained the most common diagnoses associated  
15 with antibiotic prescriptions, even though most cases are viral in origin and do not require anti-  
16 biotics. This highlights the potential impact a community-based antimicrobial stewardship pro-  
17 gram could have in reducing overall antibiotic use. Other jurisdictions have similarly found high  
18 rates of antibiotic use for URTIs (1, 5, 16), despite guidelines discouraging routine antibiotic  
19 therapy (36, 38, 39).  
20  
21  
22  
23  
24  
25  
26  
27  
28  
29  
30  
31  
32

33 Similarly, for LRTIs we found increased prescriptions for penicillins, while macrolide use fell.  
34 Although macrolides have been recommended as first-line therapy for outpatient community-  
35 acquired pneumonia (40), resistance rates in *Streptococcus pneumoniae* have approached 25%  
36 in Canada. Thus, macrolides should not be used as monotherapy in this context (41, 42). The  
37 need for 'atypical' coverage in treating community-acquired pneumonia has also been ques-  
38 tioned, which may explain some of the reductions in macrolide use (43). Within the macrolide  
39 class, growing preference for azithromycin over clarithromycin was observed. This finding may  
40 be explained by ease of administration, with single daily versus twice daily dosing, as well as  
41 studies demonstrating equivalency between three-day courses of azithromycin and longer  
42 courses of clarithromycin (44, 45). Another reason may be greater awareness of drug interac-  
43 tions involving cytochrome P450, with CYP3A4 inhibited by clarithromycin but not azithromycin  
44 (46).  
45  
46  
47  
48  
49  
50  
51  
52  
53  
54  
55  
56  
57  
58  
59  
60

1  
2  
3  
4  
5 For UTIs, we found a decline in the use of trimethoprim-sulfamethoxazole. This may reflect in-  
6 creasing recognition of its adverse effects (47), particularly among elderly patients co-prescribed  
7 common cardiovascular and renal medications (32, 48, 49). In addition, the Infectious Diseases  
8 Society of America recommends against trimethoprim-sulfamethoxazole for UTIs if local uro-  
9 pathogen resistance rates are above 20% (50). Community resistance rates in Ontario are on  
10 the rise, but remain below 20% (51-53), while inpatient resistance has exceeded this threshold  
11 (54). Prescriptions for ciprofloxacin around UTI diagnoses decreased as well. This may be due  
12 to rising awareness of the risks associated with fluoroquinolones, including tendinopathies, aor-  
13 tic aneurysm and dissection, and peripheral neuropathy (55-58). In contrast, use of nitrofuranto-  
14 in increased, in accordance with recent guidelines recommending it as first-line therapy for UTIs  
15 due to high susceptibility rates and low risk to host flora (50).  
16  
17  
18  
19  
20  
21  
22  
23  
24  
25  
26  
27  
28  
29  
30

31 Cephalexin was consistently the most prescribed antibiotic for cellulitis. We saw increases in the  
32 use of trimethoprim-sulfamethoxazole and clindamycin, which may reflect a change in practice  
33 to cover methicillin-resistant *Staphylococcus aureus*. However, clindamycin exposure is associ-  
34 ated with the highest risk of *Clostridium difficile* infection among antibiotics (59, 60)  
35  
36  
37  
38  
39  
40  
41

42 Despite these changes in antibiotic selection, 67.0% of antibiotics prescribed to Ontario's sen-  
43 iors were not associated with a recorded infectious disease diagnosis. This suggests that our  
44 databases were unable to capture the majority of antibiotic indications, even in the context of a  
45 universal single-payer healthcare system, a research institute with access to linkable physician  
46 claim, hospitalization, same-day surgery and emergency room databases, and the use of a  
47 broad seven-day window around prescriptions to identify diagnoses. Therefore, effective surveil-  
48 lance of community antibiotic use will require more comprehensive methods of capturing antibi-  
49  
50  
51  
52  
53  
54  
55  
56  
57  
58  
59  
60



1  
2  
3 otic indication, such as linkage to electronic medical records or province-wide mandatory report-  
4  
5 ing of diagnosis with each prescription.  
6  
7

8  
9  
10 This study was subject to limitations. Our database was restricted to elderly individuals age 65  
11  
12 years or older and are not generalizable to the entire population. Additional data sources are  
13  
14 needed to capture outpatient antimicrobial use in children and younger adults. Our use of ad-  
15  
16 ministrative databases may have led to misclassification of antibiotic prescriptions and diagno-  
17  
18 ses. However, these databases have been used extensively in prior studies, and the ODB and  
19  
20 DAD databases have undergone rigorous validation (33, 61). In addition, we linked antibiotic  
21  
22 prescriptions and infectious disease diagnoses through their presence within seven days of one  
23  
24 another. Although these antibiotic-diagnosis associations are likely accurate given their tem-  
25  
26 poral proximity, causation could not be ascertained. For inpatient diagnoses, which were cap-  
27  
28 tured in the DAD, date of admission was taken as the date of diagnosis. Diagnoses around out-  
29  
30 patient antibiotic prescriptions, and vice versa, may consequently have been missed, particular-  
31  
32 ly in cases of prolonged hospital stays and infections fully treated in hospital. Furthermore, the  
33  
34 OHIP database only allows for a single diagnosis to be recorded in each billing claim; infectious  
35  
36 disease diagnoses could have been unrecorded in physician visits involving multiple diagnoses  
37  
38 and comorbidities. Lastly, DDDs may be an inaccurate measure of drug utilization in patients  
39  
40 with renal impairment, a common comorbidity in elderly populations.  
41  
42  
43  
44  
45  
46  
47  
48  
49  
50  
51  
52  
53  
54  
55  
56  
57  
58  
59  
60

## Conclusion

In our analysis of outpatient antimicrobial use among senior residents of Ontario, a trend towards greater selection of narrow-spectrum antibiotics was observed. However, total antibiotic use was stable from 2006 to 2015, and antibiotics were frequently prescribed for URTIs. This emphasizes that misuse and overuse of antibiotics remains a problem. Interventions to improve antibiotic prescribing in ambulatory care are therefore warranted, and should specifically target family physicians. In addition, more than two-thirds of antibiotic prescriptions were not associated with an infectious disease diagnosis, demonstrating that existing methods of surveillance in Ontario are not capable of determining antibiotic indication. Given the lack of information on outpatient antibiotic use in Canada, this study suggests that efforts to monitor the quantity, composition and appropriateness of community use need to be strengthened. Our results can be used to guide such efforts and benchmark outpatient antimicrobial stewardship interventions.

## Disclaimer

This study was conducted at the Institute for Clinical Evaluative Sciences (ICES), which is funded by an annual grant from the Ontario Ministry of Health and Long-Term Care (MOHLTC). The opinions, results and conclusions reported in this paper are those of the authors and are independent from the funding sources. No endorsement by ICES or the Ontario MOHLTC is intended or should be inferred.

## Contributors

Nick Daneman and Erin Graves conceptualized and designed the study, and developed the statistical analysis plan. Nick Daneman and Charlie Tan analyzed and interpreted the data and drafted the manuscript. Hong Lu, Anna Chen and Shudong Li contributed to data acquisition and analysis. Kevin Schwartz contributed to data interpretation and manuscript revision. All authors reviewed the manuscript and approve the final version for publication.

## References

1. Canadian Antimicrobial Resistance Surveillance System Report 2016. Ottawa, Canada: Public Health Agency of Canada; 2016.
2. Steinman MA, Gonzales R, Linder JA, Landefeld CS. Changing use of antibiotics in community-based outpatient practice, 1991-1999. *Ann Intern Med.* 2003;138(7):525-33.
3. Grijalva CG, Nuorti JP, Griffin MR. Antibiotic prescription rates for acute respiratory tract infections in US ambulatory settings. *JAMA.* 2009;302(7):758-66.
4. Fairlie T, Shapiro DJ, Hersh AL, Hicks LA. National trends in visit rates and antibiotic prescribing for adults with acute sinusitis. *Arch Intern Med.* 2012;172(19):1513-4.
5. Shapiro DJ, Hicks LA, Pavia AT, Hersh AL. Antibiotic prescribing for adults in ambulatory care in the USA, 2007-09. *J Antimicrob Chemother.* 2014;69(1):234-40.
6. Hersh AL, Fleming-Dutra KE, Shapiro DJ, Hyun DY, Hicks LA, Workgroup OAUT-S. Frequency of First-line Antibiotic Selection Among US Ambulatory Care Visits for Otitis Media, Sinusitis, and Pharyngitis. *JAMA Intern Med.* 2016;176(12):1870-2.
7. Fleming-Dutra KE, Hersh AL, Shapiro DJ, Bartoces M, Enns EA, File TM, et al. Prevalence of Inappropriate Antibiotic Prescriptions Among US Ambulatory Care Visits, 2010-2011. *JAMA.* 2016;315(17):1864-73.
8. Spellberg B, Guidos R, Gilbert D, Bradley J, Boucher HW, Scheld WM, et al. The epidemic of antibiotic-resistant infections: a call to action for the medical community from the Infectious Diseases Society of America. *Clin Infect Dis.* 2008;46(2):155-64.
9. Costelloe C, Metcalfe C, Lovering A, Mant D, Hay AD. Effect of antibiotic prescribing in primary care on antimicrobial resistance in individual patients: systematic review and meta-analysis. *BMJ.* 2010;340:c2096.
10. Hicks LA, Chien YW, Taylor TH, Haber M, Klugman KP, Team ABCSA. Outpatient antibiotic prescribing and nonsusceptible *Streptococcus pneumoniae* in the United States, 1996-2003. *Clin Infect Dis.* 2011;53(7):631-9.
11. Goossens H, Ferech M, Vander Stichele R, Elseviers M, Group EP. Outpatient antibiotic use in Europe and association with resistance: a cross-national database study. *Lancet.* 2005;365(9459):579-87.
12. van de Sande-Bruinsma N, Grundmann H, Verloo D, Tiemersma E, Monen J, Goossens H, et al. Antimicrobial drug use and resistance in Europe. *Emerg Infect Dis.* 2008;14(11):1722-30.
13. Shehab N, Patel PR, Srinivasan A, Budnitz DS. Emergency department visits for antibiotic-associated adverse events. *Clin Infect Dis.* 2008;47(6):735-43.
14. Suda KJ, Hicks LA, Roberts RM, Hunkler RJ, Danziger LH. A national evaluation of antibiotic expenditures by healthcare setting in the United States, 2009. *J Antimicrob Chemother.* 2013;68(3):715-8.
15. Smith R, Coast J. The true cost of antimicrobial resistance. *BMJ.* 2013;346:f1493.
16. Lee GC, Reveles KR, Attridge RT, Lawson KA, Mansi IA, Lewis JS, et al. Outpatient antibiotic prescribing in the United States: 2000 to 2010. *BMC Med.* 2014;12:96.
17. Haeseker MB, Dukers-Muijers NH, Hoebe CJ, Bruggeman CA, Cals JW, Verbon A. Trends in antibiotic prescribing in adults in Dutch general practice. *PLoS One.* 2012;7(12):e51860.
18. Norris P, Horsburgh S, Keown S, Arroll B, Lovelock K, Cumming J, et al. Too much and too little? Prevalence and extent of antibiotic use in a New Zealand region. *J Antimicrob Chemother.* 2011;66(8):1921-6.

19. Pan A, Buttazzi R, Marchi M, Gagliotti C, Resi D, Moro ML, et al. Secular trends in antibiotic consumption in the adult population in Emilia-Romagna, Italy, 2003-2009. *Clin Microbiol Infect.* 2011;17(11):1698-703.
20. 2015/16 Report Card for the Ontario Drug Benefit Program. Ontario Ministry of Health and Long-Term Care; 2016.
21. Beckett CL, Harbarth S, Huttner B. Special considerations of antibiotic prescription in the geriatric population. *Clin Microbiol Infect.* 2015;21(1):3-9.
22. Faulkner CM, Cox HL, Williamson JC. Unique aspects of antimicrobial use in older adults. *Clin Infect Dis.* 2005;40(7):997-1004.
23. Denkinger CM, Grant AD, Denkinger M, Gautam S, D'Agata EM. Increased multi-drug resistance among the elderly on admission to the hospital--a 12-year surveillance study. *Arch Gerontol Geriatr.* 2013;56(1):227-30.
24. Pop-Vicas A, Tacconelli E, Gravenstein S, Lu B, D'Agata EM. Influx of multidrug-resistant, gram-negative bacteria in the hospital setting and the role of elderly patients with bacterial bloodstream infection. *Infect Control Hosp Epidemiol.* 2009;30(4):325-31.
25. March A, Aschbacher R, Dhanji H, Livermore DM, Böttcher A, Slegel F, et al. Colonization of residents and staff of a long-term-care facility and adjacent acute-care hospital geriatric unit by multiresistant bacteria. *Clin Microbiol Infect.* 2010;16(7):934-44.
26. Born KB, Leis JA, Gold WL, Levinson W. "Choosing Wisely Canada" and antimicrobial stewardship: A shared focus on reducing unnecessary care. *Canada Communicable Disease Report.* 2015;41(S-4):9-13.
27. Antibiotic Awareness Week in Canada Winnipeg, Manitoba: National Collaborating Centre for Infectious Diseases; 2016 [Available from: <https://nccid.ca/antibiotic-awareness/>].
28. Drekonja DM, Filice GA, Greer N, Olson A, MacDonald R, Rutks I, et al. Antimicrobial stewardship in outpatient settings: a systematic review. *Infect Control Hosp Epidemiol.* 2015;36(2):142-52.
29. Patrick D, Grant J, Saxinger L. Surveillance of antimicrobial resistance and utilization in Canada. Winnipeg: National Collaborating Centre for Infectious Diseases; 2014.
30. Daneman N, Gruneir A, Bronskill SE, Newman A, Fischer HD, Rochon PA, et al. Prolonged antibiotic treatment in long-term care: role of the prescriber. *JAMA Intern Med.* 2013;173(8):673-82.
31. Daneman N, Bronskill SE, Gruneir A, Newman AM, Fischer HD, Rochon PA, et al. Variability in Antibiotic Use Across Nursing Homes and the Risk of Antibiotic-Related Adverse Outcomes for Individual Residents. *JAMA Intern Med.* 2015;175(8):1331-9.
32. Fralick M, Macdonald EM, Gomes T, Antoniou T, Hollands S, Mamdani MM, et al. Cotrimoxazole and sudden death in patients receiving inhibitors of renin-angiotensin system: population based study. *BMJ.* 2014;349:g6196.
33. Levy AR, O'Brien BJ, Sellors C, Grootendorst P, Willison D. Coding accuracy of administrative drug claims in the Ontario Drug Benefit database. *Can J Clin Pharmacol.* 2003;10(2):67-71.
34. Definition and general considerations: WHO Collaborating Centre for Drug Statistics Methodology; 2009 [Available from: [http://www.whocc.no/ddd/definition\\_and\\_general\\_considera/](http://www.whocc.no/ddd/definition_and_general_considera/)].
35. Adriaenssens N, Coenen S, Versporten A, Muller A, Minalu G, Faes C, et al. European Surveillance of Antimicrobial Consumption (ESAC): outpatient antibiotic use in Europe (1997-2009). *J Antimicrob Chemother.* 2011;66 Suppl 6:vi3-12.
36. Harris AM, Hicks LA, Qaseem A, Prevention HVCTFotACoPaffCfDCa. Appropriate Antibiotic Use for Acute Respiratory Tract Infection in Adults: Advice for High-Value Care From the American College of Physicians and the Centers for Disease Control and Prevention. *Ann Intern Med.* 2016;164(6):425-34.

- 1
- 2
- 3 37. Wong DM, Blumberg DA, Lowe LG. Guidelines for the use of antibiotics in acute upper
- 4 respiratory tract infections. *Am Fam Physician*. 2006;74(6):956-66.
- 5 38. Chow AW, Benninger MS, Brook I, Brozek JL, Goldstein EJ, Hicks LA, et al. IDSA clinical
- 6 practice guideline for acute bacterial rhinosinusitis in children and adults. *Clin Infect Dis*.
- 7 2012;54(8):e72-e112.
- 8 39. Desrosiers M, Evans GA, Keith PK, Wright ED, Kaplan A, Bouchard J, et al. Canadian
- 9 clinical practice guidelines for acute and chronic rhinosinusitis. *J Otolaryngol Head Neck*
- 10 *Surg*. 2011;40 Suppl 2:S99-193.
- 11 40. Mandell LA, Wunderink RG, Anzueto A, Bartlett JG, Campbell GD, Dean NC, et al. Infec-
- 12 tious Diseases Society of America/American Thoracic Society consensus guidelines on
- 13 the management of community-acquired pneumonia in adults. *Clin Infect Dis*. 2007;44
- 14 Suppl 2:S27-72.
- 15 41. Demczuk W, Griffith A, Singh R, Martin I, Mulvey M. National Laboratory Surveillance of
- 16 Invasive Streptococcal Disease in Canada - Annual Summary 2013. Ottawa, Canada:
- 17 Public Health Agency of Canada; 2013.
- 18 42. Wierzbowski AK, Karlowsky JA, Adam HJ, Nichol KA, Hoban DJ, Zhanel GG, et al. Evolu-
- 19 tion and molecular characterization of macrolide-resistant *Streptococcus pneumoniae* in
- 20 Canada between 1998 and 2008. *J Antimicrob Chemother*. 2014;69(1):59-66.
- 21 43. Postma DF, van Werkhoven CH, van Elden LJ, Thijsen SF, Hoepelman AI, Kluytmans JA,
- 22 et al. Antibiotic treatment strategies for community-acquired pneumonia in adults. *N Engl J*
- 23 *Med*. 2015;372(14):1312-23.
- 24 44. Drehobl MA, De Salvo MC, Lewis DE, Breen JD. Single-dose azithromycin microspheres
- 25 vs clarithromycin extended release for the treatment of mild-to-moderate community-
- 26 acquired pneumonia in adults. *Chest*. 2005;128(4):2230-7.
- 27 45. O'Doherty B, Muller O. Randomized, multicentre study of the efficacy and tolerance of
- 28 azithromycin versus clarithromycin in the treatment of adults with mild to moderate com-
- 29 munity-acquired pneumonia. Azithromycin Study Group. *Eur J Clin Microbiol Infect Dis*.
- 30 1998;17(12):828-33.
- 31 46. Pai MP, Graci DM, Amsden GW. Macrolide drug interactions: an update. *Ann Pharma-*
- 32 *cother*. 2000;34(4):495-513.
- 33 47. Ho JM, Juurlink DN. Considerations when prescribing trimethoprim-sulfamethoxazole.
- 34 *CMAJ*. 2011;183(16):1851-8.
- 35 48. Antoniou T, Gomes T, Juurlink DN, Loutfy MR, Glazier RH, Mamdani MM. Trimethoprim-
- 36 sulfamethoxazole-induced hyperkalemia in patients receiving inhibitors of the renin-
- 37 angiotensin system: a population-based study. *Arch Intern Med*. 2010;170(12):1045-9.
- 38 49. Antoniou T, Hollands S, Macdonald EM, Gomes T, Mamdani MM, Juurlink DN, et al. Tri-
- 39 methoprim-sulfamethoxazole and risk of sudden death among patients taking spironolac-
- 40 tone. *CMAJ*. 2015;187(4):E138-43.
- 41 50. Gupta K, Hooton TM, Naber KG, Wullt B, Colgan R, Miller LG, et al. International clinical
- 42 practice guidelines for the treatment of acute uncomplicated cystitis and pyelonephritis in
- 43 women: A 2010 update by the Infectious Diseases Society of America and the European
- 44 Society for Microbiology and Infectious Diseases. *Clin Infect Dis*. 2011;52(5):e103-20.
- 45 51. J Mclsaac W, Mazzulli T, Moineddin R, Raboud J, Ross S. Uropathogen antibiotic re-
- 46 sistance in adult women presenting to family physicians with acute uncomplicated cystitis.
- 47 *Can J Infect Dis Med Microbiol*. 2004;15(5):266-70.
- 48 52. Mclsaac WJ, Mazzulli T, Permaul J, Moineddin R, Low DE. Community-acquired antibiotic
- 49 resistance in urinary isolates from adult women in Canada. *Can J Infect Dis Med Microbi-*
- 50 *ol*. 2006;17(6):337-40.
- 51 53. Mclsaac WJ, Moineddin R, Meaney C, Mazzulli T. Antibiotic-resistant *Escherichia coli* in
- 52 women with acute cystitis in Canada. *Can J Infect Dis Med Microbiol*. 2013;24(3):143-9.
- 53
- 54
- 55
- 56
- 57
- 58
- 59
- 60

- 1
  - 2
  - 3
  - 4
  - 5
  - 6
  - 7
  - 8
  - 9
  - 10
  - 11
  - 12
  - 13
  - 14
  - 15
  - 16
  - 17
  - 18
  - 19
  - 20
  - 21
  - 22
  - 23
  - 24
  - 25
  - 26
  - 27
  - 28
  - 29
  - 30
  - 31
  - 32
  - 33
  - 34
  - 35
  - 36
  - 37
  - 38
  - 39
  - 40
  - 41
  - 42
  - 43
  - 44
  - 45
  - 46
  - 47
  - 48
  - 49
  - 50
  - 51
  - 52
  - 53
  - 54
  - 55
  - 56
  - 57
  - 58
  - 59
  - 60
54. Karlowsky JA, Lagacé-Wiens PR, Simner PJ, DeCorby MR, Adam HJ, Walkty A, et al. Antimicrobial resistance in urinary tract pathogens in Canada from 2007 to 2009: CANWARD surveillance study. *Antimicrob Agents Chemother*. 2011;55(7):3169-75.
55. Khaliq Y, Zhanel GG. Fluoroquinolone-associated tendinopathy: a critical review of the literature. *Clin Infect Dis*. 2003;36(11):1404-10.
56. Daneman N, Lu H, Redelmeier DA. Fluoroquinolones and collagen associated severe adverse events: a longitudinal cohort study. *BMJ Open*. 2015;5(11):e010077.
57. Lee CC, Lee MT, Chen YS, Lee SH, Chen SC, Chang SC. Risk of Aortic Dissection and Aortic Aneurysm in Patients Taking Oral Fluoroquinolone. *JAMA Intern Med*. 2015;175(11):1839-47.
58. Etminan M, Brophy JM, Samii A. Oral fluoroquinolone use and risk of peripheral neuropathy: a pharmacoepidemiologic study. *Neurology*. 2014;83(14):1261-3.
59. Brown KA, Khanafer N, Daneman N, Fisman DN. Meta-analysis of antibiotics and the risk of community-associated *Clostridium difficile* infection. *Antimicrob Agents Chemother*. 2013;57(5):2326-32.
60. Deshpande A, Pasupuleti V, Thota P, Pant C, Rolston DD, Sferra TJ, et al. Community-associated *Clostridium difficile* infection and antibiotics: a meta-analysis. *J Antimicrob Chemother*. 2013;68(9):1951-61.
61. Juurlink D, Preyra C, Croxford R, Chong A, Austin P, Tu J, et al. Canadian Institute for Health Information Discharge Abstract Database: A Validation Study. Toronto: Institute for Clinical Evaluative Sciences; 2006.



1  
2  
3  
4  
5  
6  
7  
8  
9  
10  
11  
12  
13  
14  
15  
16  
17  
18  
19  
20  
21  
22  
23  
24  
25  
26  
27  
28  
29  
30  
31  
32  
33  
34  
35  
36  
37  
38  
39  
40  
41  
42  
43  
44  
45  
46  
47  
48  
49  
50  
51  
52  
53  
54  
55  
56  
57  
58  
59  
60

Confidential



**Table 1** Proportion of outpatient antibiotic prescriptions to Ontario's senior residents provided by family physicians and specialists, in 2006 and 2015

| Provider         | Antibiotic prescriptions, in individual claims (%) |                | Antibiotic prescriptions, in defined daily doses (%) |                  |
|------------------|----------------------------------------------------|----------------|------------------------------------------------------|------------------|
|                  | 2006                                               | 2015           | 2006                                                 | 2015             |
| Family physician | 195 745 (76.7)                                     | 227 569 (69.8) | 2 230 258 (75.4)                                     | 2 409 323 (68.1) |
| Specialist       | 59 499 (23.3)                                      | 98 412 (30.2)  | 726 659 (24.6)                                       | 1 127 512 (31.9) |

Confidential

1  
2  
3  
4  
5  
6  
7  
8  
9  
10 **Figure 1** Proportion of Ontario's senior residents who received one or more outpatient antimicrobial prescriptions, divided by antimicrobial class, from 2006 to 2015

11  
12  
13  
14  
15  
16 **Figure 2** Total outpatient prescriptions, in DDDs per 1000 person days, of the five antibiotic classes most commonly prescribed to Ontario's senior residents, from 2006 to 2015

17  
18  
19  
20  
21  
22  
23  
24  
25 **Figure 3** Total outpatient prescriptions, in DDDs per 1000 person days, of the 10 antibiotics most commonly prescribed to Ontario's senior residents, divided by infectious disease indication, from 2006 to 2015. TMP/SMX = trimethoprim-sulfamethoxazole.

26  
27  
28  
29  
30  
31  
32  
33  
34 **Figure 4** Outpatient prescriptions, in DDDs per 1000 person days, of the 10 antibiotics most commonly prescribed for **a.** upper respiratory tract infections, **b.** urinary tract infections, **c.** lower respiratory tract infections, and **d.** cellulitis to Ontario's senior residents, in 2006 and 2015.

35  
36  
37  
38  
39  
40 TMP/SMX = trimethoprim-sulfamethoxazole, Amox/Clav = amoxicillin-clavulanic acid.

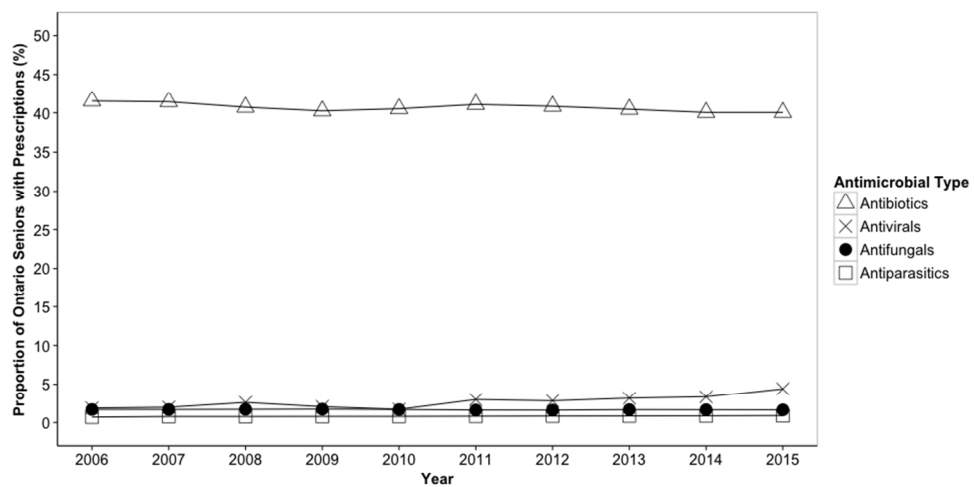

Figure 1: Proportion of Ontario's senior residents who received one or more outpatient antimicrobial prescriptions, divided by antimicrobial class, from 2006 to 2015

352x176mm (72 x 72 DPI)

1  
2  
3  
4  
5  
6  
7  
8  
9  
10  
11  
12  
13  
14  
15  
16  
17  
18  
19  
20  
21  
22  
23  
24  
25  
26  
27  
28  
29  
30  
31  
32  
33  
34  
35  
36  
37  
38  
39  
40  
41  
42  
43  
44  
45  
46  
47  
48  
49  
50  
51  
52  
53  
54  
55  
56  
57  
58  
59  
60

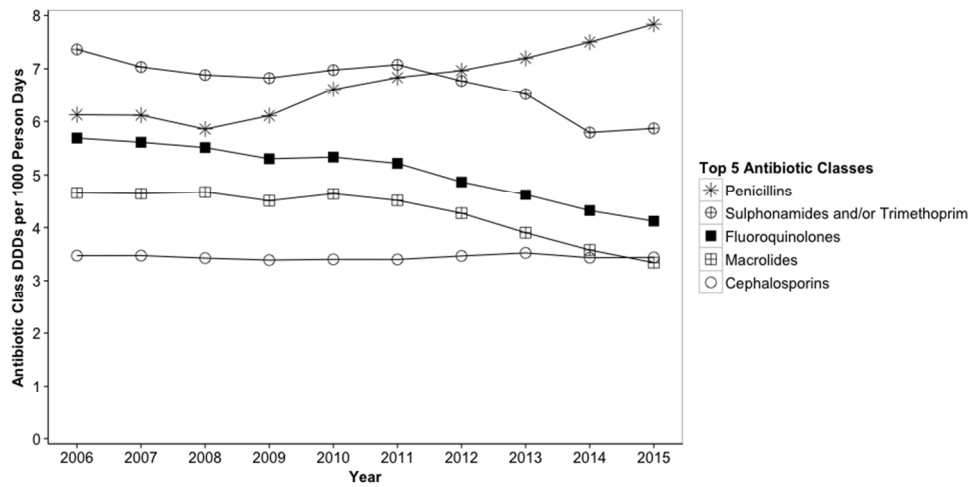

Figure 2: Total outpatient prescriptions, in DDDs per 1000 person days, of the five antibiotic classes most commonly prescribed to Ontario's senior residents, from 2006 to 2015

352x176mm (72 x 72 DPI)

Confidential

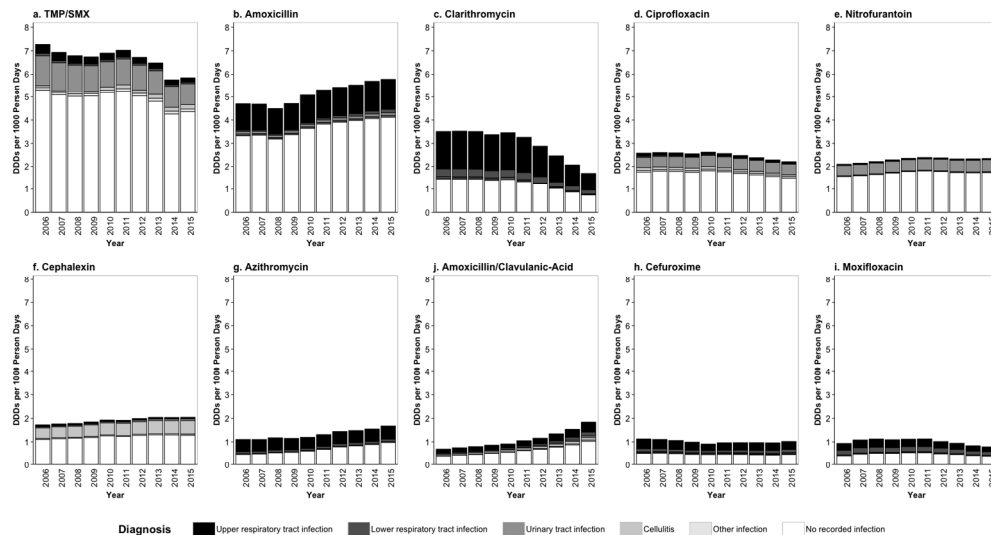

Figure 3: Total outpatient prescriptions, in DDDs per 1000 person days, of the 10 antibiotics most commonly prescribed to Ontario’s senior residents, divided by infectious disease indication, from 2006 to 2015. TMP/SMX = trimethoprim-sulfamethoxazole.

635x352mm (72 x 72 DPI)

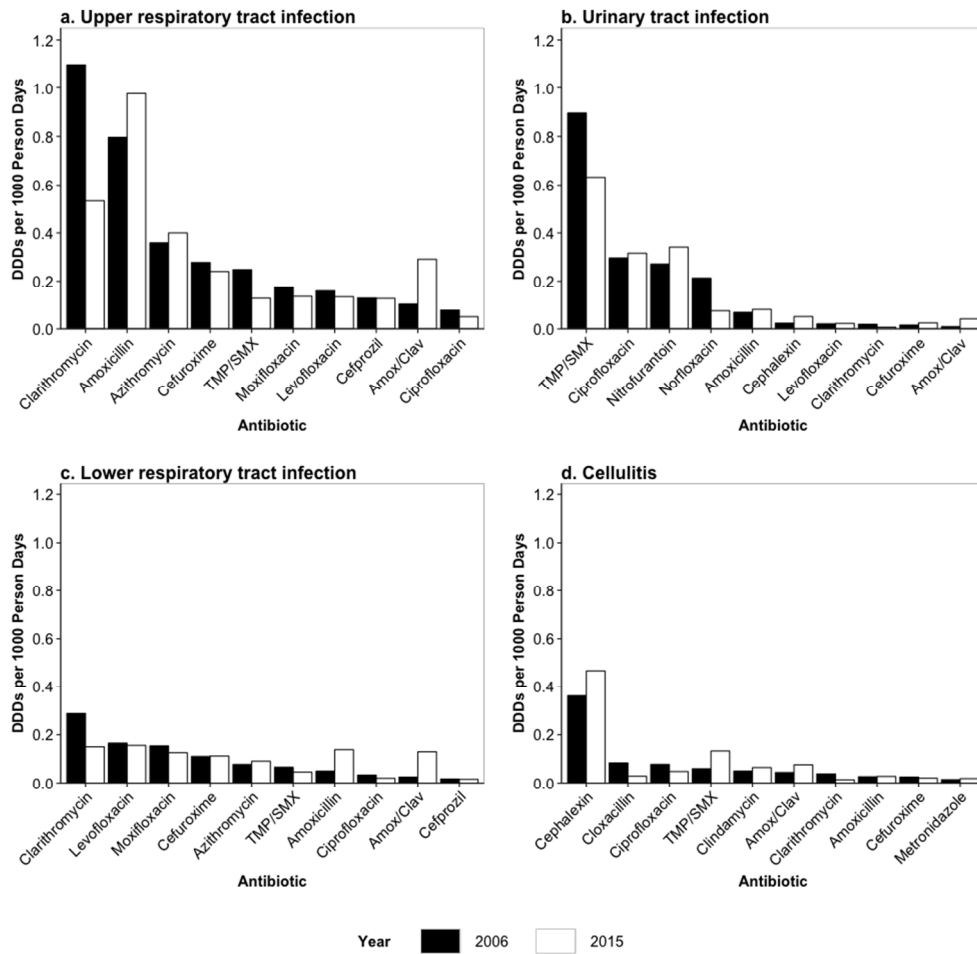

Figure 4: Outpatient prescriptions, in DDDs per 1000 person days, of the 10 antibiotics most commonly prescribed for a. upper respiratory tract infections, b. urinary tract infections, c. lower respiratory tract infections, and d. cellulitis to Ontario's senior residents, in 2006 and 2015. TMP/SMX = trimethoprim-sulfamethoxazole, Amox/Clav = amoxicillin-clavulanic acid.

352x352mm (72 x 72 DPI)

**Supplementary File 1** Drugs included in each antimicrobial class

**Antibiotics**

- Amikacin
- Amoxicillin
- Amoxicillin & clavulanic acid
- Ampicillin
- Azithromycin
- Cefaclor
- Cefadroxil
- Cefazolin
- Cefixime
- Cefotaxime
- Cefoxitin
- Cefprozil
- Ceftazidime
- Ceftriaxone
- Cefuroxime
- Cephalexin
- Ciprofloxacin
- Clarithromycin
- Clindamycin
- Cloxacillin
- Colistin
- Dapsone
- Daptomycin
- Demeclocycline
- Doxycycline
- Ertapenem
- Erythromycin
- Ethambutol
- Ethionamide
- Fidaxomicin
- Fosfomycin
- Fusidic acid
- Gatifloxacin
- Gentamicin
- Isoniazid
- Levofloxacin
- Linezolid
- Meropenem
- Metronidazole
- Minocycline
- Moxifloxacin
- Nitrofurantoin
- Norfloxacin
- Ofloxacin
- Paromomycin
- Penicillin V
- Penicillin V benzathine

- Piperacillin & tazobactam
- Pivampicillin
- Pyrazinamide
- Rifabutin
- Rifampin
- Streptomycin
- Trimethoprim & sulfamethoxazole
- Telithromycin
- Tetracycline
- Tigecycline
- Tobramycin
- Trimethoprim
- Vancomycin

**Antivirals**

- Abacavir
- Abacavir & lamivudine
- Abacavir & dolutegravir & lamivudine
- Abacavir & lamivudine & zidovudine
- Acyclovir
- Adefovir
- Amantadine
- Amprenavir
- Atazanavir
- Boceprevir
- Cobicistat & elvitegravir & emtricitabine & tenofovir
- Darunavir
- Dasabuvir & ombitasvir & paritaprevir & ritonavir
- Delavirdine
- Didanosine
- Dolutegravir
- Efavirenz
- Efavirenz & emtricitabine & tenofovir
- Emtricitabine & rilpivirine & tenofovir
- Emtricitabine & tenofovir
- Enfuvirtide
- Entecavir
- Etravirine
- Fanciclovir

- Fosamprenavir
- Ganciclovir
- Indinavir
- Lamivudine
- Lamivudine & zidovudine
- Ledipasvir & sofosbuvir
- Lopinavir & ritonavir
- Maraviroc
- Nelfinavir
- Nevirapine
- Oseltamivir
- Peg-Interferon alfa 2B
- Peg-Interferon alfa-2B & ribavirin
- Raltegravir
- Ribavirin
- Rilpivirine
- Ritonavir
- Saquinavir
- Simeprevir
- Sofosbuvir
- Stavudine
- Telaprevir
- Tenofovir
- Tipranavir
- Valacyclovir
- Valganciclovir
- Zidovudine

**Antifungals**

- Amphotericin B
- Atovaquone
- Caspofungin
- Fluconazole
- Griseofulvin
- Itraconazole
- Ketoconazole
- Micafungin
- Nystatin
- Pentamidine isethionate
- Posaconazole
- Terbinafine
- Voriconazole

**Antiparasitics**

- Chloroquine
- Hydroxychloroquine
- Mebendazole

1  
2  
3  
4  
5  
6  
7  
8  
9  
10  
11  
12  
13  
14  
15  
16  
17  
18  
19  
20  
21  
22  
23  
24  
25  
26  
27  
28  
29  
30  
31  
32  
33  
34  
35  
36  
37  
38  
39  
40  
41  
42  
43  
44  
45  
46  
47  
48  
49  
50  
51  
52  
53  
54  
55  
56  
57  
58  
59  
60

- Praziquantel
- Pyrimethamine
- Pyrvinium
- Quinine

Confidential



## STROBE Statement—checklist of items that should be included in reports of observational studies

**Note:** Since our study was a descriptive study of outpatient antimicrobial use, there was no specific EQUATOR reporting guideline available. We have completed the STROBE checklist for observational studies. Many of the items were not applicable since our study did not follow a cohort, case-control or cross-sectional design.

|                           | Item No | Recommendation                                                                                                                                                                                                                                                                                                                                                                                                                                                         | Page |
|---------------------------|---------|------------------------------------------------------------------------------------------------------------------------------------------------------------------------------------------------------------------------------------------------------------------------------------------------------------------------------------------------------------------------------------------------------------------------------------------------------------------------|------|
| <b>Title and abstract</b> | 1       | (a) Indicate the study's design with a commonly used term in the title or the abstract                                                                                                                                                                                                                                                                                                                                                                                 | 1,2  |
|                           |         | (b) Provide in the abstract an informative and balanced summary of what was done and what was found                                                                                                                                                                                                                                                                                                                                                                    | 2,3  |
| <b>Introduction</b>       |         |                                                                                                                                                                                                                                                                                                                                                                                                                                                                        |      |
| Background/rationale      | 2       | Explain the scientific background and rationale for the investigation being reported                                                                                                                                                                                                                                                                                                                                                                                   | 4    |
| Objectives                | 3       | State specific objectives, including any prespecified hypotheses                                                                                                                                                                                                                                                                                                                                                                                                       | 5    |
| <b>Methods</b>            |         |                                                                                                                                                                                                                                                                                                                                                                                                                                                                        |      |
| Study design              | 4       | Present key elements of study design early in the paper                                                                                                                                                                                                                                                                                                                                                                                                                | 6    |
| Setting                   | 5       | Describe the setting, locations, and relevant dates, including periods of recruitment, exposure, follow-up, and data collection                                                                                                                                                                                                                                                                                                                                        | 6    |
| Participants              | 6       | (a) <i>Cohort study</i> —Give the eligibility criteria, and the sources and methods of selection of participants. Describe methods of follow-up<br><i>Case-control study</i> —Give the eligibility criteria, and the sources and methods of case ascertainment and control selection. Give the rationale for the choice of cases and controls<br><i>Cross-sectional study</i> —Give the eligibility criteria, and the sources and methods of selection of participants | 7    |
|                           |         | (b) <i>Cohort study</i> —For matched studies, give matching criteria and number of exposed and unexposed<br><i>Case-control study</i> —For matched studies, give matching criteria and the number of controls per case                                                                                                                                                                                                                                                 | NA   |
| Variables                 | 7       | Clearly define all outcomes, exposures, predictors, potential confounders, and effect modifiers. Give diagnostic criteria, if applicable                                                                                                                                                                                                                                                                                                                               | 7,8  |
| Data sources/measurement  | 8*      | For each variable of interest, give sources of data and details of methods of assessment (measurement). Describe comparability of assessment methods if there is more than one group                                                                                                                                                                                                                                                                                   | 6    |
| Bias                      | 9       | Describe any efforts to address potential sources of bias                                                                                                                                                                                                                                                                                                                                                                                                              | NA   |

|    |                        |     |                                                                                                                                                                                                              |       |
|----|------------------------|-----|--------------------------------------------------------------------------------------------------------------------------------------------------------------------------------------------------------------|-------|
| 1  |                        |     |                                                                                                                                                                                                              |       |
| 2  | Study size             | 10  | Explain how the study size was arrived at                                                                                                                                                                    | NA    |
| 3  |                        |     |                                                                                                                                                                                                              |       |
| 4  | Quantitative variables | 11  | Explain how quantitative variables were handled in the analyses. If applicable, describe which groupings were chosen and why                                                                                 | 7     |
| 5  |                        |     |                                                                                                                                                                                                              |       |
| 6  |                        |     |                                                                                                                                                                                                              |       |
| 7  | Statistical methods    | 12  | (a) Describe all statistical methods, including those used to control for confounding                                                                                                                        | NA    |
| 8  |                        |     |                                                                                                                                                                                                              |       |
| 9  |                        |     | (b) Describe any methods used to examine subgroups and interactions                                                                                                                                          | NA    |
| 10 |                        |     |                                                                                                                                                                                                              |       |
| 11 |                        |     |                                                                                                                                                                                                              |       |
| 12 |                        |     | (c) Explain how missing data were addressed                                                                                                                                                                  | NA    |
| 13 |                        |     |                                                                                                                                                                                                              |       |
| 14 |                        |     | (d) <i>Cohort study</i> —If applicable, explain how loss to follow-up was addressed                                                                                                                          | NA    |
| 15 |                        |     | <i>Case-control study</i> —If applicable, explain how matching of cases and controls was addressed                                                                                                           |       |
| 16 |                        |     | <i>Cross-sectional study</i> —If applicable, describe analytical methods taking account of sampling strategy                                                                                                 |       |
| 17 |                        |     |                                                                                                                                                                                                              |       |
| 18 |                        |     | (e) Describe any sensitivity analyses                                                                                                                                                                        | NA    |
| 19 |                        |     |                                                                                                                                                                                                              |       |
| 20 |                        |     |                                                                                                                                                                                                              |       |
| 21 |                        |     |                                                                                                                                                                                                              |       |
| 22 |                        |     |                                                                                                                                                                                                              |       |
| 23 |                        |     |                                                                                                                                                                                                              |       |
| 24 |                        |     |                                                                                                                                                                                                              |       |
| 25 | <b>Results</b>         |     |                                                                                                                                                                                                              |       |
| 26 |                        |     |                                                                                                                                                                                                              |       |
| 27 | Participants           | 13* | (a) Report numbers of individuals at each stage of study—eg numbers potentially eligible, examined for eligibility, confirmed eligible, included in the study, completing follow-up, and analysed            | 10    |
| 28 |                        |     |                                                                                                                                                                                                              |       |
| 29 |                        |     | (b) Give reasons for non-participation at each stage                                                                                                                                                         | NA    |
| 30 |                        |     |                                                                                                                                                                                                              |       |
| 31 |                        |     | (c) Consider use of a flow diagram                                                                                                                                                                           | NA    |
| 32 |                        |     |                                                                                                                                                                                                              |       |
| 33 |                        |     |                                                                                                                                                                                                              |       |
| 34 |                        |     |                                                                                                                                                                                                              |       |
| 35 | Descriptive data       | 14* | (a) Give characteristics of study participants (eg demographic, clinical, social) and information on exposures and potential confounders                                                                     | 10–13 |
| 36 |                        |     |                                                                                                                                                                                                              |       |
| 37 |                        |     | (b) Indicate number of participants with missing data for each variable of interest                                                                                                                          | NA    |
| 38 |                        |     |                                                                                                                                                                                                              |       |
| 39 |                        |     | (c) <i>Cohort study</i> —Summarise follow-up time (eg, average and total amount)                                                                                                                             | NA    |
| 40 |                        |     |                                                                                                                                                                                                              |       |
| 41 |                        |     |                                                                                                                                                                                                              |       |
| 42 | Outcome data           | 15* | <i>Cohort study</i> —Report numbers of outcome events or summary measures over time                                                                                                                          | NA    |
| 43 |                        |     |                                                                                                                                                                                                              |       |
| 44 |                        |     | <i>Case-control study</i> —Report numbers in each exposure category, or summary measures of exposure                                                                                                         | NA    |
| 45 |                        |     |                                                                                                                                                                                                              |       |
| 46 |                        |     | <i>Cross-sectional study</i> —Report numbers of outcome events or summary measures                                                                                                                           | NA    |
| 47 |                        |     |                                                                                                                                                                                                              |       |
| 48 |                        |     |                                                                                                                                                                                                              |       |
| 49 | Main results           | 16  | (a) Give unadjusted estimates and, if applicable, confounder-adjusted estimates and their precision (eg, 95% confidence interval). Make clear which confounders were adjusted for and why they were included | NA    |
| 50 |                        |     |                                                                                                                                                                                                              |       |
| 51 |                        |     | (b) Report category boundaries when continuous variables were categorized                                                                                                                                    | NA    |
| 52 |                        |     |                                                                                                                                                                                                              |       |
| 53 |                        |     | (c) If relevant, consider translating estimates of relative risk into absolute risk for a meaningful time period                                                                                             | NA    |
| 54 |                        |     |                                                                                                                                                                                                              |       |
| 55 |                        |     |                                                                                                                                                                                                              |       |
| 56 |                        |     |                                                                                                                                                                                                              |       |
| 57 |                        |     |                                                                                                                                                                                                              |       |
| 58 |                        |     |                                                                                                                                                                                                              |       |
| 59 |                        |     |                                                                                                                                                                                                              |       |
| 60 |                        |     |                                                                                                                                                                                                              |       |

|                          |    |                                                                                                                                                                            |           |
|--------------------------|----|----------------------------------------------------------------------------------------------------------------------------------------------------------------------------|-----------|
| Other analyses           | 17 | Report other analyses done—eg analyses of subgroups and interactions, and sensitivity analyses                                                                             | NA        |
| <b>Discussion</b>        |    |                                                                                                                                                                            |           |
| Key results              | 18 | Summarise key results with reference to study objectives                                                                                                                   | 14        |
| Limitations              | 19 | Discuss limitations of the study, taking into account sources of potential bias or imprecision. Discuss both direction and magnitude of any potential bias                 | 17        |
| Interpretation           | 20 | Give a cautious overall interpretation of results considering objectives, limitations, multiplicity of analyses, results from similar studies, and other relevant evidence | 14–<br>17 |
| Generalisability         | 21 | Discuss the generalisability (external validity) of the study results                                                                                                      | 17        |
| <b>Other information</b> |    |                                                                                                                                                                            |           |
| Funding                  | 22 | Give the source of funding and the role of the funders for the present study and, if applicable, for the original study on which the present article is based              | 1,19      |

\*Give information separately for cases and controls in case-control studies and, if applicable, for exposed and unexposed groups in cohort and cross-sectional studies.

**Note:** An Explanation and Elaboration article discusses each checklist item and gives methodological background and published examples of transparent reporting. The STROBE checklist is best used in conjunction with this article (freely available on the Web sites of PLoS Medicine at <http://www.plosmedicine.org/>, Annals of Internal Medicine at <http://www.annals.org/>, and Epidemiology at <http://www.epidem.com/>). Information on the STROBE Initiative is available at [www.strobe-statement.org](http://www.strobe-statement.org).
